# Supplementary material for: Can achievement at medical admission tests predict future performance in postgraduate clinical assessments? A UK-based national cohort study
Source: HighWire-hosted journal article supplement (doi:10.1136/bmjopen-2021-056129), 2022-02-01
Supplement: bmjopen-2021-056129supp001_data_supplement.pdf [file bmjopen-2021-056129supp001_data_supplement.pdf]

## Supplemental Material for ‘Can achievement at medical admissions tests predict future performance in postgraduate clinical assessments? A national cohort study’

Lewis W Paton, I C McManus, Kevin Y F Cheung, Daniel S Smith, Paul A Tiffin

### A: Passing each section of the MRCP at the first attempt

Tables A1 – A3 display the results for models predicting passing each section of the Membership of the Royal Colleges of Physicians of the UK (MRCP) at the first attempt. These results are also depicted in Figures 2 and 3.

| Pass at 1 <sup>st</sup> attempt              | MRCP: Part 1                   |                                |
|----------------------------------------------|--------------------------------|--------------------------------|
|                                              | Unadjusted ORs                 | ORs adjusted for PEA           |
| <b>BMAT</b>                                  |                                |                                |
| <b>Aptitude and Skills</b>                   | 1.29 (1.10 to 1.52)<br>p=0.002 | 1.22 (1.04 to 1.44)<br>p=0.02  |
| <b>Scientific Knowledge and Applications</b> | 1.58 (1.33 to 1.88)<br>p<0.001 | 1.49 (1.25 to 1.78)<br>p<0.001 |
| <b>Writing</b>                               | 1.02 (0.87 to 1.19)<br>p=0.84  | 1.00 (0.86 to 1.17)<br>p=0.98  |
| <b>‘Total’</b>                               | 1.53 (1.30 to 1.80)<br>p<0.001 | 1.44 (1.22 to 1.69)<br>p<0.001 |
| <b>UCAT</b>                                  |                                |                                |
| <b>Abstract Reasoning</b>                    | 1.08 (0.94 to 1.25)<br>p=0.28  | 1.04 (0.90 to 1.21)<br>p=0.56  |
| <b>Decision Analysis</b>                     | 1.12 (0.95 to 1.32)<br>p=0.17  | 1.09 (0.92 to 1.28)<br>p=0.32  |
| <b>Quantitative Reasoning</b>                | 1.41 (1.19 to 1.67)<br>p<0.001 | 1.37 (1.16 to 1.62)<br>p<0.001 |
| <b>Verbal Reasoning</b>                      | 1.29 (1.09 to 1.53)<br>p=0.003 | 1.24 (1.05 to 1.48)<br>p=0.01  |
| <b>Total</b>                                 | 1.43 (1.18 to 1.73)<br>p<0.001 | 1.35 (1.11 to 1.63)<br>p=0.003 |
| <b>‘Rebalanced’ total</b>                    | 1.43 (1.19 to 1.72)<br>p<0.001 | 1.35 (1.12 to 1.63)<br>p<0.01  |

**Table A1.** Results from multilevel logistic regression models predicting passing *MRCP: Part 1* at the first attempt, unadjusted and adjusted for prior educational attainment (PEA).

| Pass at 1 <sup>st</sup> attempt              | MRCP: Part 2                   |                               |
|----------------------------------------------|--------------------------------|-------------------------------|
|                                              | Unadjusted ORs                 | ORs adjusted for PEA          |
| <b>BMAT</b>                                  |                                |                               |
| <b>Aptitude and Skills</b>                   | 1.36 (1.06 to 1.75)<br>p=0.02  | 1.36 (1.05 to 1.75)<br>p=0.02 |
| <b>Scientific Knowledge and Applications</b> | 1.35 (1.04 to 1.75)<br>p=0.02  | 1.35 (1.04 to 1.75)<br>p=0.02 |
| <b>Writing</b>                               | 1.13 (0.89 to 1.45)<br>p=0.32  | 1.12 (0.88 to 1.44)<br>p=0.36 |
| <b>'Total'</b>                               | 1.44 (1.13 to 1.83)<br>p<0.01  | 1.44 (1.13 to 1.84)<br>p<0.01 |
| <b>UCAT</b>                                  |                                |                               |
| <b>Abstract Reasoning</b>                    | 0.80 (0.64 to 0.99)<br>p=0.04  | 0.79 (0.64 to 0.99)<br>p=0.04 |
| <b>Decision Analysis</b>                     | 1.02 (0.79 to 1.33)<br>p=0.86  | 1.02 (0.78 to 1.32)<br>p=0.91 |
| <b>Quantitative Reasoning</b>                | 1.27 (0.98 to 1.65)<br>p=0.07  | 1.26 (0.97 to 1.65)<br>p=0.08 |
| <b>Verbal Reasoning</b>                      | 1.55 (1.18 to 2.04)<br>p=0.002 | 1.55 (1.17 to 2.04)<br>p<0.01 |
| <b>Total</b>                                 | 1.17 (0.87 to 1.58)<br>p=0.30  | 1.15 (0.85 to 1.56)<br>p=0.36 |
| <b>'Balanced' total</b>                      | 1.38 (1.03 to 1.86)<br>p=0.03  | 1.37 (1.02 to 1.85)<br>p=0.04 |

**Table A2.** Results from multilevel logistic regression models predicting passing *MRCP: Part 2* at the first attempt, unadjusted and adjusted for prior educational attainment (PEA).

| Pass at 1 <sup>st</sup> attempt              | MRCP: PACES                    |                               |
|----------------------------------------------|--------------------------------|-------------------------------|
|                                              | Unadjusted ORs                 | ORs adjusted for PEA          |
| <b>BMAT</b>                                  |                                |                               |
| <b>Aptitude and Skills</b>                   | 1.35 (1.09 to 1.68)<br>p=0.01  | 1.34 (1.08 to 1.67)<br>p=0.01 |
| <b>Scientific Knowledge and Applications</b> | 1.13 (0.90 to 1.42)<br>p=0.30  | 1.12 (0.89 to 1.41)<br>p=0.34 |
| <b>Writing</b>                               | 1.12 (0.88 to 1.43)<br>p=0.34  | 1.10 (0.87 to 1.41)<br>p=0.42 |
| <b>'Total'</b>                               | 1.27 (1.04 to 1.56)<br>p=0.02  | 1.26 (1.03 to 1.55)<br>p=0.03 |
| <b>UCAT</b>                                  |                                |                               |
| <b>Abstract Reasoning</b>                    | 1.07 (0.88 to 1.32)<br>p=0.49  | 1.05 (0.86 to 1.29)<br>p=0.63 |
| <b>Decision Analysis</b>                     | 1.09 (0.86 to 1.38)<br>p=0.47  | 1.06 (0.83 to 1.34)<br>p=0.66 |
| <b>Quantitative Reasoning</b>                | 1.17 (0.92 to 1.48)<br>p=0.20  | 1.15 (0.91 to 1.46)<br>p=0.25 |
| <b>Verbal Reasoning</b>                      | 1.38 (1.07 to 1.76)<br>p=0.01  | 1.34 (1.04 to 1.71)<br>p=0.02 |
| <b>Total</b>                                 | 1.30 (>1.00 to 1.69)<br>p=0.05 | 1.25 (0.96 to 1.64)<br>p=0.10 |
| <b>'Rebalanced' total</b>                    | 1.39 (1.07 to 1.80)<br>p=0.01  | 1.34 (1.03 to 1.75)<br>p=0.03 |

**Table A3.** Results from multilevel logistic regression models predicting passing *MRCP: PACES* at the first attempt, unadjusted and adjusted for prior educational attainment (PEA).

**B: Imputed results**

Tables B1-B3 display results from multilevel logistic models fitted to both non-imputed and imputed data. These models are adjusted for prior educational attainment.

| Pass at 1 <sup>st</sup> attempt              | MRCP: Part 1                   |                                |
|----------------------------------------------|--------------------------------|--------------------------------|
|                                              | Adjusted ORs                   |                                |
|                                              | Non-imputed                    | Imputed                        |
| <b>BMAT</b>                                  |                                |                                |
| <b>Aptitude and skills</b>                   | 1.22 (1.04 to 1.44)<br>p=0.02  | 1.25 (1.08 to 1.45)<br>p<0.01  |
| <b>Scientific knowledge and applications</b> | 1.49 (1.25 to 1.78)<br>p<0.001 | 1.52 (1.30 to 1.78)<br>p<0.001 |
| <b>Writing</b>                               | 1.00 (0.86 to 1.17)<br>p=0.98  | 1.08 (0.94 to 1.24)<br>p=0.30  |
| <b>'Total'</b>                               | 1.44 (1.22 to 1.69)<br>p<0.001 | 1.48 (1.28 to 1.71)<br>p<0.001 |
| <b>UCAT</b>                                  |                                |                                |
| <b>Abstract Reasoning</b>                    | 1.04 (0.90 to 1.21)<br>p=0.56  | 1.07 (0.98 to 1.17)<br>p=0.14  |
| <b>Decision Analysis</b>                     | 1.09 (0.92 to 1.28)<br>p=0.32  | 1.10 (<1.00 to 1.21)<br>p=0.06 |
| <b>Quantitative Reasoning</b>                | 1.37 (1.16 to 1.62)<br>p<0.001 | 1.31 (1.18 to 1.45)<br>p<0.001 |
| <b>Verbal Reasoning</b>                      | 1.24 (1.05 to 1.48)<br>p=0.01  | 1.30 (1.17 to 1.43)<br>p<0.001 |
| <b>Total</b>                                 | 1.35 (1.11 to 1.63)<br>p=0.003 | 1.37 (1.22 to 1.54)<br>p<0.001 |
| <b>'Rebalanced' total</b>                    | 1.35 (1.12 to 1.63)<br>p<0.01  | 1.40 (1.25 to 1.56)<br>p<0.001 |

**Table B1.** Comparison of odds ratios on non-imputed and imputed data, predicting passing *MRCP: Part 1* at the first attempt. All models are adjusted for prior educational attainment.

| Pass at 1 <sup>st</sup> attempt              | MRCP: Part 2                   |                                |
|----------------------------------------------|--------------------------------|--------------------------------|
|                                              | Adjusted ORs                   |                                |
|                                              | Non-imputed                    | Imputed                        |
| <b>BMAT</b>                                  |                                |                                |
| <b>Aptitude and skills</b>                   | 1.36 (1.05 to 1.75)<br>p=0.02  | 1.35 (1.09 to 1.67)<br>p=0.01  |
| <b>Scientific knowledge and applications</b> | 1.35 (1.04 to 1.75)<br>p=0.02  | 1.33 (1.06 to 1.65)<br>p=0.01  |
| <b>Writing</b>                               | 1.12 (0.88 to 1.44)<br>p=0.36  | 1.14 (0.92 to 1.40)<br>p=0.24  |
| <b>'Total'</b>                               | 1.44 (1.13 to 1.84)<br>p<0.01  | 1.40 (1.13 to 1.72)<br>p<0.01  |
| <b>UCAT</b>                                  |                                |                                |
| <b>Abstract Reasoning</b>                    | 0.79 (0.64 to 0.99)<br>p=0.04  | 1.00 (0.87 to 1.16)<br>p=0.97  |
| <b>Decision Analysis</b>                     | 1.02 (0.78 to 1.32)<br>p=0.91  | 0.98 (0.83 to 1.12)<br>p=0.66  |
| <b>Quantitative Reasoning</b>                | 1.26 (0.97 to 1.65)<br>p=0.08  | 1.22 (1.04 to 1.44)<br>p=0.02  |
| <b>Verbal Reasoning</b>                      | 1.55 (1.17 to 2.04)<br>p=0.002 | 1.47 (1.25 to 1.74)<br>p<0.001 |
| <b>Total</b>                                 | 1.15 (0.85 to 1.56)<br>p=0.36  | 1.26 (1.05 to 1.52)<br>p=0.01  |
| <b>'Rebalanced' total</b>                    | 1.37 (1.02 to 1.85)<br>p=0.04  | 1.42 (1.19 to 1.70)<br>p<0.001 |

**Table B2.** Comparison of odds ratios on non-imputed and imputed data, predicting passing *MRCP: Part 2* at the first attempt. All models are adjusted for prior educational attainment.

| Pass at 1 <sup>st</sup> attempt              | MRCP: PACES                   |                                |
|----------------------------------------------|-------------------------------|--------------------------------|
|                                              | Adjusted ORs                  |                                |
|                                              | Non-imputed                   | Imputed                        |
| <b>BMAT</b>                                  |                               |                                |
| <b>Aptitude and skills</b>                   | 1.34 (1.08 to 1.67)<br>p=0.01 | 1.20 (1.03 to 1.40)<br>p=0.02  |
| <b>Scientific knowledge and applications</b> | 1.12 (0.89 to 1.41)<br>p=0.34 | 1.12 (0.94 to 1.35)<br>p=0.21  |
| <b>Writing</b>                               | 1.10 (0.87 to 1.41)<br>p=0.42 | 1.00 (0.84 to 1.19)<br>p=0.99  |
| <b>'Total'</b>                               | 1.26 (1.03 to 1.55)<br>p=0.03 | 1.19 (1.03 to 1.37)<br>p=0.02  |
| <b>UCAT</b>                                  |                               |                                |
| <b>Abstract Reasoning</b>                    | 1.05 (0.86 to 1.29)<br>p=0.63 | 1.10 (0.97 to 1.24)<br>p=0.13  |
| <b>Decision Analysis</b>                     | 1.06 (0.83 to 1.34)<br>p=0.66 | 1.14 (>1.00 to 1.30)<br>p=0.05 |
| <b>Quantitative Reasoning</b>                | 1.15 (0.91 to 1.46)<br>p=0.25 | 1.07 (0.94 to 1.23)<br>p=0.31  |
| <b>Verbal Reasoning</b>                      | 1.34 (1.04 to 1.71)<br>p=0.02 | 1.15 (>1.00 to 1.32)<br>p=0.05 |
| <b>Total</b>                                 | 1.25 (0.96 to 1.64)<br>p=0.10 | 1.22 (1.05 to 1.42)<br>p=0.01  |
| <b>'Rebalanced' total</b>                    | 1.34 (1.03 to 1.75)<br>p=0.03 | 1.22 (1.05 to 1.41)<br>p=0.01  |

**Table B3.** Comparison of odds ratios on non-imputed and imputed data, predicting passing *MRCP: PACES* at the first attempt. All models are adjusted for prior educational attainment.

**C: Results from ‘score relative to pass’**

Tables C1 – C3 display results from linear regression models predicting score relative to pass at each section of the MRCP(UK) at the first attempt. Regression coefficients are shown unadjusted and adjusted for prior educational attainment.

| Score relative to pass                       | MRCP: Part 1                    |                                 |
|----------------------------------------------|---------------------------------|---------------------------------|
|                                              | Unadjusted $\beta$              | $\beta$ adjusted for PEA        |
| <b>BMAT</b>                                  |                                 |                                 |
| <b>Aptitude and Skills</b>                   | 1.25 (0.68 to 1.82)<br>p<0.001  | 1.07 (0.49 to 1.65)<br>p<0.001  |
| <b>Scientific Knowledge and Applications</b> | 2.02 (1.43 to 2.60)<br>p<0.001  | 1.83 (1.24 to 2.42)<br>p<0.001  |
| <b>Writing</b>                               | -0.04 (-0.60 to 0.51)<br>p=0.88 | -0.06 (-0.62 to 0.49)<br>p=0.83 |
| <b>‘Total’</b>                               | 1.95 (1.40 to 2.50)<br>p<0.001  | 1.76 (1.20 to 2.32)<br>p<0.001  |
| <b>UCAT</b>                                  |                                 |                                 |
| <b>Abstract Reasoning</b>                    | 0.25 (-0.25 to 0.75)<br>p=0.38  | 0.14 (-0.36 to 0.64)<br>p=0.59  |
| <b>Decision Analysis</b>                     | 0.46 (-0.10 to 1.03)<br>p=0.11  | 0.37 (-0.19 to 0.94)<br>p=0.19  |
| <b>Quantitative Reasoning</b>                | 1.62 (1.03 to 2.21)<br>p<0.001  | 1.51 (0.92 to 2.10)<br>p<0.001  |
| <b>Verbal Reasoning</b>                      | 1.03 (0.43 to 1.62)<br>p<0.001  | 0.91 (0.31 to 1.50)<br>p<0.01   |
| <b>Total</b>                                 | 1.46 (0.80 to 2.11)<br>p<0.001  | 1.27 (0.61 to 1.93)<br>p<0.001  |
| <b>‘Rebalanced’ total</b>                    | 1.47 (0.82 to 2.12)<br>p<0.001  | 1.30 (0.64 to 1.95)<br>p<0.001  |

**Table C1.** Results from multilevel linear regression models predicting score relative to pass on *MRCP: Part 1* at the first attempt, unadjusted and adjusted for prior educational attainment (PEA).

| Score relative to pass                       | MRCP: Part 2                   |                                |
|----------------------------------------------|--------------------------------|--------------------------------|
|                                              | Unadjusted $\beta$             | $\beta$ adjusted for PEA       |
| <b>BMAT</b>                                  |                                |                                |
| <b>Aptitude and Skills</b>                   | 1.80 (1.27 to 2.32)<br>p<0.001 | 1.75 (1.21 to 2.28)<br>p<0.001 |
| <b>Scientific Knowledge and Applications</b> | 1.71 (1.16 to 2.26)<br>p<0.001 | 1.71 (1.16 to 2.27)<br>p<0.001 |
| <b>Writing</b>                               | 0.30 (-0.26 to 0.87)<br>p=0.29 | 0.38 (-0.19 to 0.95)<br>p=0.19 |
| <b>'Total'</b>                               | 1.90 (1.42 to 2.38)<br>p<0.001 | 1.87 (1.37 to 2.36)<br>p<0.001 |
| <b>UCAT</b>                                  |                                |                                |
| <b>Abstract Reasoning</b>                    | 0.05 (-0.45 to 0.55)<br>p=0.84 | 0.04 (-0.47 to 0.55)<br>p=0.87 |
| <b>Decision Analysis</b>                     | 0.37 (-0.21 to 0.95)<br>p=0.21 | 0.38 (-0.20 to 0.97)<br>p=0.20 |
| <b>Quantitative Reasoning</b>                | 1.14 (0.53 to 1.74)<br>p<0.001 | 1.17 (0.56 to 1.78)<br>p<0.001 |
| <b>Verbal Reasoning</b>                      | 1.66 (1.04 to 2.27)<br>p<0.001 | 1.62 (1.00 to 2.25)<br>p<0.001 |
| <b>Total</b>                                 | 1.22 (0.56 to 1.88)<br>p<0.001 | 1.25 (0.58 to 1.92)<br>p<0.001 |
| <b>'Rebalanced' total</b>                    | 1.60 (0.95 to 2.26)<br>p<0.001 | 1.69 (1.03 to 2.36)<br>p<0.001 |

**Table C2.** Results from multilevel linear regression models predicting score relative to pass on *MRCP: Part 2* at the first attempt, unadjusted and adjusted for prior educational attainment (PEA).



| Score relative to pass                       | MRCP: PACES                    |                                |
|----------------------------------------------|--------------------------------|--------------------------------|
|                                              | Unadjusted $\beta$             | $\beta$ adjusted for PEA       |
| <b>BMAT</b>                                  |                                |                                |
| <b>Aptitude and Skills</b>                   | 2.37 (0.88 to 2.89)<br>p<0.01  | 2.36 (0.85 to 3.87)<br>p<0.01  |
| <b>Scientific Knowledge and Applications</b> | 1.68 (0.11 to 3.36)<br>p=0.04  | 1.66 (0.07 to 3.26)<br>p=0.04  |
| <b>Writing</b>                               | 1.22 (-0.47 to 2.92)<br>p=0.16 | 1.17 (-0.54 to 2.88)<br>p=0.18 |
| <b>'Total'</b>                               | 2.19 (0.80 to 3.57)<br>p<0.01  | 2.19 (0.78 to 3.60)<br>p<0.01  |
| <b>UCAT</b>                                  |                                |                                |
| <b>Abstract Reasoning</b>                    | 0.68 (-0.77 to 2.14)<br>p=0.36 | 0.62 (-0.85 to 2.10)<br>p=0.41 |
| <b>Decision Analysis</b>                     | 0.86 (-0.84 to 2.55)<br>p=0.32 | 0.77 (-0.96 to 2.50)<br>p=0.38 |
| <b>Quantitative Reasoning</b>                | 0.79 (-0.91 to 2.49)<br>p=0.36 | 0.74 (-0.97 to 2.44)<br>p=0.40 |
| <b>Verbal Reasoning</b>                      | 3.00 (1.33 to 4.67)<br>p<0.001 | 2.99 (1.28 to 4.70)<br>p<0.001 |
| <b>Total</b>                                 | 2.18 (0.36 to 4.00)<br>p=0.02  | 2.14 (0.26 to 4.02)<br>p=0.03  |
| <b>'Rebalanced' total</b>                    | 2.88 (1.09 to 4.66)<br>p<0.01  | 2.89 (1.04 to 4.74)<br>p<0.01  |

**Table C3.** Results from multilevel linear regression models predicting score relative to pass on *MRCP: PACES* at the first attempt, unadjusted and adjusted for prior educational attainment (PEA).
